# Supplementary material for: Amniotic fluid embolism – implementation of international diagnosis criteria and subsequent pregnancy recurrence risk
Source: publisher site journal article supplement (doi:10.1515/jpm-2020-0391), 2021-01-19
Supplement: Supplementary file 1 [file j_jpm-2020-0391_suppl.docx]

August 2020

Prof. Joachim W. Dudenhausen,

Editor in Chief

Journal of Perinatal Medicine

On behalf of my co-authors, I am pleased to submit the attached manuscript: *“****Amniotic fluid embolism – Implementation of international diagnosis criteria and subsequent pregnancy recurrence risk”*** for your considerration for publication in the Journal of Perinatal Medicine.

Amniotic fluid embolism remains a cause for significant obstetric maternal morbidity and mortality. A recent diagnostic criterion has been published, aiming to precise the diagnosis of amniotic fluid embolism and differentiate this entity from alternative diagnoses.

The existing literature regarding subsequent pregnancies in after a previous amniotic fluid embolism is sparse, limiting the consultation prior to an additional pregnancy in survivors.

In our study we present a case series of amniotic fluid emboli in one tertiary medical center thought a 15-year period, implementing the aforementioned diagnostic criteria.

Additionally, we bring the outcomes of subsequent pregnancies in amniotic fluid embolism survivors, which to our knowledge, is the largest to date.

We believe that the findings in this study have a significant clinical impact and you will find it suitable for publication in your influential journal.

The manuscript has not been published elsewhere and it will not be submitted elsewhere until a final decision is made by the editorial board of the Journal of Perinatal Medicine.

No conflict of interest for any of the authors exist.

All authors participated in writing, literature review and editing the submission.

All authors read and approved the final manuscript.

An institutional review board approval was obtained for this study.

I hope this paper will be suitable for publication in your esteemed Journal.

Sincerely,

Cahan Tal, MD

Sheba Medical Center,

Sheba Rd 2, Ramat Gan, 5265601

Telephone: 647-390-5764 : Email: [tal.cahan@gmail.com](mailto:tal.cahan@gmail.com)

Signed by: Cahan Tal , MD
